# Supplementary material for: Tomographic reconstruction strategies for nondestructive testing with a commercial CT scanner
Source: Frontiers journal article supplement (doi:10.3389/feart.2023.1287059), 2023-12-15
Supplement: Data_Sheet_1.PDF [file Data_Sheet_1.PDF]

# Supplementary Material

## 1 SUPPLEMENTARY TABLES AND FIGURES

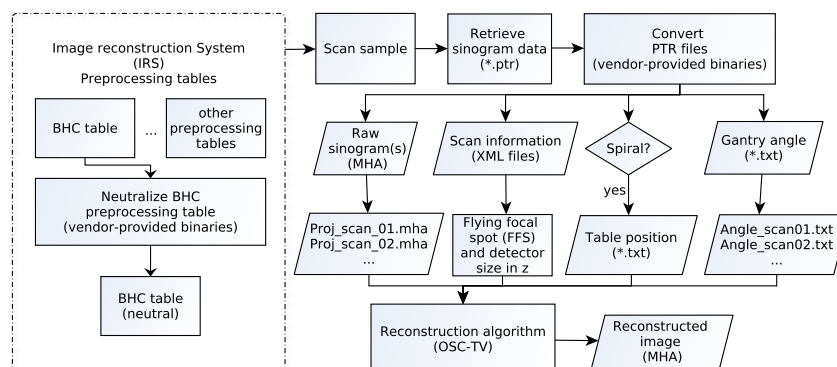

**Figure S1.** Reconstruction software flowchart using vendor-provided binaries and an in-house reconstruction algorithm.

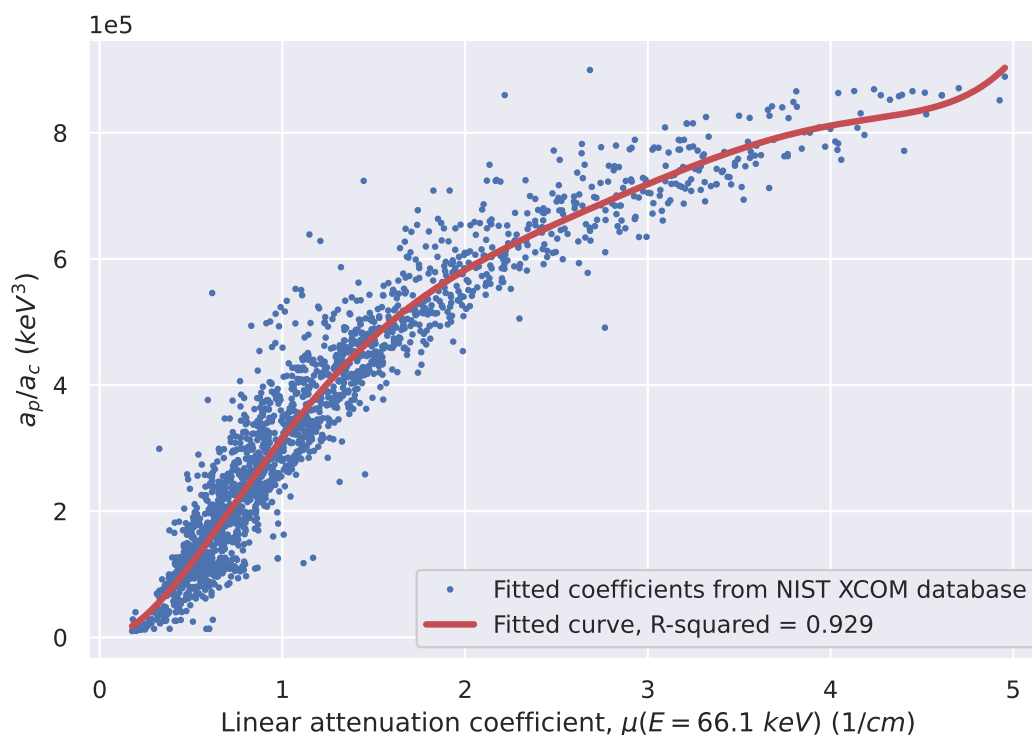

**Figure S2.** Calibration curve used in the OSC-TV-poly algorithm, which estimates  $a_p/a_c$  from uncorrected linear attenuation coefficient. The pairs  $a_p/a_c$  represent the photoelectric, and Compton coefficients, and were calculated in the work of Trotta et al. 2022 [1], which were based on a large list of materials compiled by Bathelmy [2]. More than 3,000 materials are used, constrained by the effective atomic number  $Z_{eff} \leq 27$ , and the density  $\rho \leq 5.2 \text{ g/cm}^3$ . Elements that present K-edges in the 20 to 140 keV energy range are not considered. The correspondent linear attenuation coefficients are evaluated at the effective energy of the 100 kVp beam ( $E_0=66.1 \text{ keV}$ ).

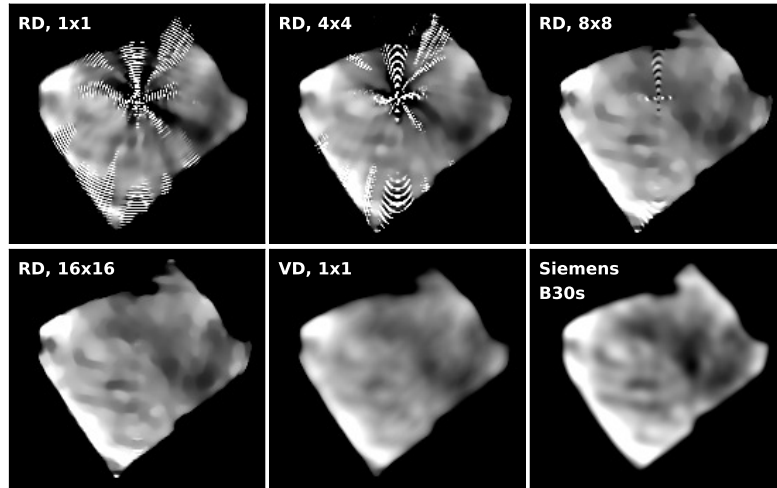

**Figure S3.** Chalcopyrite scanned at 140 kVp, reconstructions performed using OSC-TV and different approaches for forward- and backprojection: ray-driven with different number of rays per detector bin (*e.g.* 1x1, 4x4, etc.), voxel-driven (1 ray per voxel, 1x1), and the reconstruction provided by Siemens using the kernel B30s. Window [1.1:1.6]  $\text{cm}^{-1}$ .

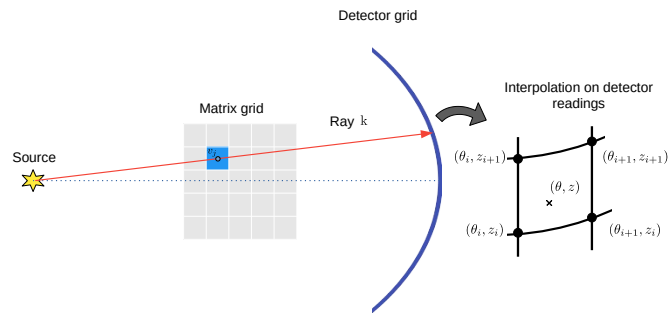

**Figure S4.** Voxel-driven backprojection with bilinear interpolation. Center of voxel  $v_j$  is projected onto the detector, where interpolation on adjacent detector readings takes place.

**Table S1.** Calibration values for the Siemens water phantom. Mean attenuation values (1/cm) are shown for preprocessed and neutral projections.

| Water phantom | Linear attenuation coefficient, $\mu$ ( $\text{cm}^{-1}$ ) |         |                                       |
|---------------|------------------------------------------------------------|---------|---------------------------------------|
|               | Preprocessed                                               | Neutral | Tabulated from NIST XCOM at $E_{eff}$ |
| 100 kVp       | 0.192                                                      | 0.199   | 0.197 (66.1 keV)                      |
| 140 kVp       | 0.192                                                      | 0.184   | 0.181 (83 keV)                        |

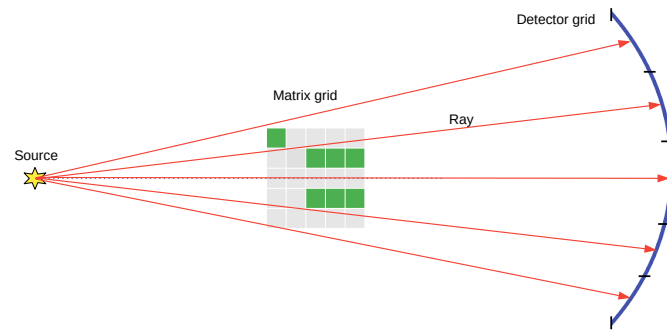

**Figure S5.** Ray-driven backprojection. Depiction of several rays going from source to center of detector element, intercepting voxels. Some voxels are poorly intercepted or not intercepted at all.
